# Supplementary material
Source: HighWire-hosted journal article supplement (https://www.cmajopen.ca/highwire/filestream/87103/field_highwire_adjunct_files/5/open-2020-0303-squire-checklist.pdf)
Supplement: open-2020-0303-squire-checklist.pdf [file open-2020-0303-squire-checklist.pdf]

## Reporting Guideline for the manuscript:

Examining data sharing practices in Canadian Institutes of Health Research-funded publications: A descriptive study

## Use of Reporting Guideline

When beginning our study, we explored a variety of guidelines that were best suited for our methodology. The SQUIRE guideline most closely aligned with our approach, however we felt that because SQUIRE is directly related to quality improvement in healthcare rather than the data sharing practices of Canadian health sciences researchers and its implications on discovery, access, and reuse (a form of quality improvement), it was ultimately not suited as a formal guideline to use as the reporting structure for our study.

That said, we acknowledge that CMAJ Open requires the inclusion of a reporting guideline during the manuscript submission process. Because many of the reporting standards included in SQUIRE match the structure of our study, we have included the page numbers/sections of our manuscript using SQUIRE to demonstrate that we have sufficiently reported the key information needed to understand our study.

## SQUIRE 2.0 (Standards for QUality Improvement Reporting Excellence): revised publication guidelines from a detailed consensus process

| Title and Abstract              | Location in Manuscript                            |
|---------------------------------|---------------------------------------------------|
| 1. Title                        | Page 1                                            |
| 2. Abstract                     | Page 2                                            |
| Introduction                    | <i>Why did you start?</i>                         |
| 3. Problem Description          | Page 3                                            |
| 4. Available knowledge          | Page 3                                            |
| 5. Rationale                    | Page 3                                            |
| 6. Specific aims                | Page 3                                            |
| Methods                         | <i>What did you do?</i>                           |
| 7. Context                      | Page 3                                            |
| 8. Intervention(s)              | Page 4-5                                          |
| 9. Study of the Intervention(s) | Page 5-7                                          |
| 10. Measures                    | Page 5-7                                          |
| 11. Analysis                    | Page 5-7                                          |
| 12. Ethical Considerations      | N/A                                               |
| Results                         | <i>What did you find?</i>                         |
| 13. Results                     | Page 7-16                                         |
| Discussion                      | <i>What does it mean?</i>                         |
| 14. Summary                     | Page 16-17                                        |
| 15. Interpretation              | Page 17-18                                        |
| 16. Limitations                 | Page 18                                           |
| 17. Conclusions                 | Page 17-18                                        |
| Other information               | Data availability statement available on Page 18. |
| 18. Funding                     | Page 18                                           |
